# Supplementary material for: Transcriptomic Profiling of Intracranial Arteries in Adult Patients With Moyamoya Disease Reveals Novel Insights Into Its Pathogenesis
Source: PubMed Central journal article supplement (PMC9197469; doi:10.3389/fnmol.2022.881954), 2022-05-31

**Figure S1. Heatmap for hemorrhagic and ischemic MMD**

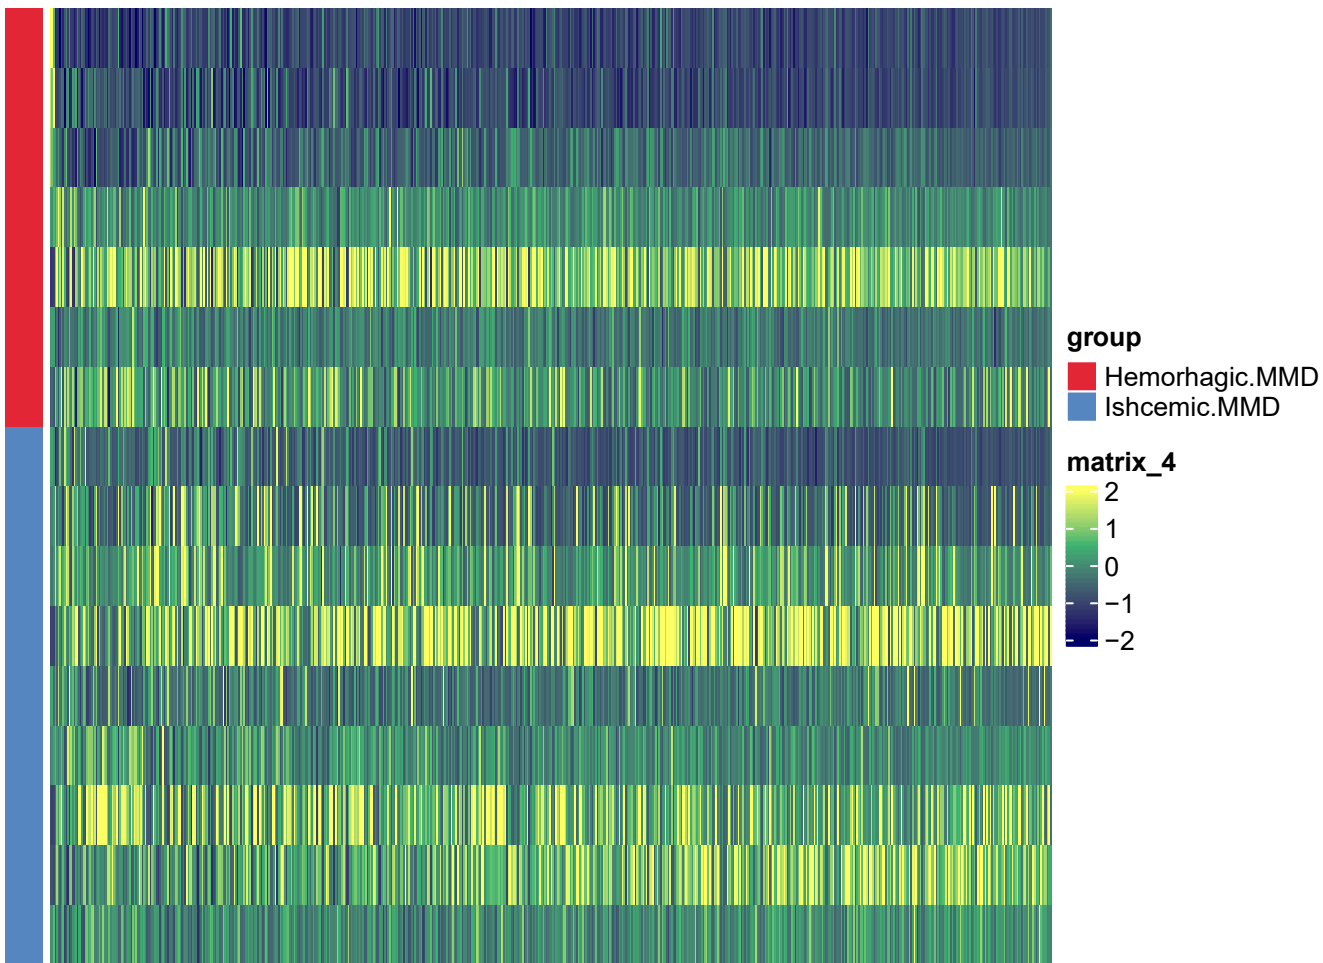

Supplement: Image_1.pdf [file Image_1.pdf]
